# Supplementary material
Source: PubMed Central journal article supplement (PMC7966559)
Supplement: 3006_appendix.pdf [file 3006_appendix.pdf]

## Supplementary Appendix

This appendix has been provided by the authors to give readers additional information about their work.

**On-line Table 1. Demographic features of subjects with activated BAT and controls**

|                          | BAT<br>( <i>n</i> = 15) | Controls<br>( <i>n</i> = 30) | <i>P</i><br>Value <sup>a</sup> |
|--------------------------|-------------------------|------------------------------|--------------------------------|
| Sex                      | 10 women,<br>5 men      | 20 women,<br>10 men          | 1.000                          |
| Age (yr)                 | 35.67 ± 6.66            | 37.43 ± 6.14                 | .904                           |
| BMI (kg/m <sup>2</sup> ) | 20.12 ± 1.47            | 20.29 ± 1.43                 | .971                           |
| FPG (mmol/L)             | 4.62 ± 0.54             | 4.71 ± 0.36                  | .089                           |
| Handedness (R:L:N/A)     | 14:0:1                  | 29:0:1                       | –                              |
| Outdoor temperature (°C) | 8.87 ± 4.56             | 8.00 ± 5.43                  | .334                           |

**Note:**—R indicates right; L, left; N/A, not applicable; –, indicates statistical analysis was not applicable.

<sup>a</sup> *P* values are based on the Student *t* test.

**On-line Table 2. Demographic features of BAT-positive subjects**

|                          | T1 ( <i>n</i> = 15) | T2 ( <i>n</i> = 15) | <i>P</i><br>Value <sup>a</sup> |
|--------------------------|---------------------|---------------------|--------------------------------|
| Sex                      | 10 women,<br>5 men  | 10 women,<br>5 men  | 1.000                          |
| Age (yr)                 | 35.67 ± 6.66        | 35.67 ± 6.66        | 1.000                          |
| BMI (kg/m <sup>2</sup> ) | 20.12 ± 1.47        | 20.08 ± 1.56        | 0.638                          |
| FPG (mmol/L)             | 4.62 ± 0.54         | 4.81 ± 0.44         | 0.308                          |
| Handedness (R:L:N/A)     | 14:0:1              | 14:0:1              | –                              |
| Outdoor temperature (°C) | 8.87 ± 4.56         | 9.07 ± 6.67         | 0.875                          |

**Note:**—T1 indicates before heat exposure; T2, after heat exposure; R indicates right; L, left; N/A, not applicable; –, indicates statistical analysis was not applicable.

<sup>a</sup> *P* values are based on paired *t* tests.

**On-line Table 3. Brain regions with significant metabolic difference between BAT-positive and BAT-negative groups**

| Brain Region                                                                      | Side  | <i>K<sub>E</sub></i> <sup>a</sup> | Coordinates <sup>b</sup> |     |     | <i>Z<sub>max</sub></i> |
|-----------------------------------------------------------------------------------|-------|-----------------------------------|--------------------------|-----|-----|------------------------|
|                                                                                   |       |                                   | x                        | y   | z   |                        |
| Hypoactivity of BAT-positive group compared with BAT-negative group <sup>c</sup>  |       |                                   |                          |     |     |                        |
| Parietal lobe, inferior parietal lobule (BA 40)                                   | Left  | 33                                | –52                      | –36 | 26  | 3.50                   |
| Limbic lobe, posterior cingulate (BA 23)                                          | Right | 42                                | 8                        | –36 | 26  | 3.49                   |
| Frontal lobe, rectal gyrus (BA 11)                                                | Right | 41                                | 6                        | 34  | –28 | 3.30                   |
| Hyperactivity of BAT-positive group compared with BAT-negative group <sup>c</sup> |       |                                   |                          |     |     |                        |
| Parietal lobe, precuneus (BA 7)                                                   | Left  | 343                               | –4                       | –80 | 38  | 3.59                   |

**Note:**—*K<sub>E</sub>* indicates extend threshold.

<sup>a</sup> Uncorrected *P* < .001 *K<sub>E</sub>* = 80.

<sup>b</sup> MNI standard space.

<sup>c</sup> Survived in age- and FDR-corrected *P* < .01.

**On-line Table 4. Brain regions with significant metabolic changes following BAT elimination by heat exposure (28°C)**

| Hypoactivity of BAT-Positive Subjects<br>Compared with Themselves after Heat<br>Exposure <sup>a</sup> /Brain Region |                             |     | Coordinates <sup>c</sup> |     |     | Z <sub>max</sub> |
|---------------------------------------------------------------------------------------------------------------------|-----------------------------|-----|--------------------------|-----|-----|------------------|
| Side                                                                                                                | K <sub>E</sub> <sup>b</sup> | x   | y                        | z   |     |                  |
| Parietal lobe, inferior parietal lobule (BA 40)                                                                     | Left                        | 576 | -40                      | -60 | 64  | 4.58             |
| Parietal lobe, inferior parietal lobule (BA 40)                                                                     | Left                        |     | -40                      | 36  | 38  | 3.75             |
| Parietal lobe, postcentral gyrus (BA 5)                                                                             | Left                        |     | -26                      | -50 | 68  | 3.87             |
| Frontal lobe, subgyral (BA 6)                                                                                       | Right                       | 61  | 28                       | -4  | 58  | 4.14             |
| Frontal lobe, inferior frontal gyrus (BA 44)                                                                        | Left                        |     | -48                      | 0   | 22  | 3.44             |
| Frontal lobe, medial frontal gyrus (BA 6)                                                                           | Left                        | 80  | 0                        | -24 | 52  | 3.70             |
| Frontal lobe, middle frontal gyrus (BA 9)                                                                           | Left                        | 53  | -42                      | 28  | 30  | 3.57             |
| Anterior lobe, culmen                                                                                               | Right                       | 138 | 30                       | -60 | -34 | 3.58             |
| Anterior lobe                                                                                                       | Right                       |     | 30                       | -48 | -38 | 3.39             |
| Sublobar, insula (BA 13)                                                                                            | Left                        | 80  | -40                      | -6  | 18  | 4.00             |
| Sublobar, lentiform nucleus                                                                                         | Right                       | 65  | 28                       | -2  | -8  | 3.95             |
| Limbic lobe, cingulate gyrus (BA 31)                                                                                | Left                        |     | -8                       | -28 | 46  | 3.31             |

**Note:**—K<sub>E</sub> indicates extend threshold.

<sup>a</sup> Survived in FDR-corrected  $P < .05$ .

<sup>b</sup> Uncorrected  $P < .001$  K<sub>E</sub> = 50.

<sup>c</sup> MNI standard space.

**On-line Table 5. Group differences in regional cerebral metabolism after heat exposure of the BAT-positive group (28°C)**

| Brain Region                                                                                          | Side  | K <sub>E</sub> <sup>a</sup> | Coordinates <sup>b</sup> |     |    | Z <sub>max</sub> |
|-------------------------------------------------------------------------------------------------------|-------|-----------------------------|--------------------------|-----|----|------------------|
|                                                                                                       |       |                             | x                        | y   | z  |                  |
| Hypoactivity of BAT-positive group after heat exposure compared with BAT-negative group <sup>c</sup>  |       |                             |                          |     |    |                  |
| Temporal lobe, transverse temporal gyrus (BA 42)                                                      | Right | 232                         | 60                       | -14 | 8  | 3.94             |
| Temporal lobe, middle temporal gyrus (BA 21)                                                          | Right |                             | 64                       | -4  | -4 | 3.31             |
| Temporal lobe, superior temporal gyrus (BA 22)                                                        | Left  | 148                         | -58                      | -18 | -2 | 3.66             |
| Limbic lobe, cingulate gyrus (BA 31)                                                                  | Right | 110                         | 18                       | -50 | 22 | 3.64             |
| Limbic lobe, posterior cingulate (BA 23)                                                              | Right |                             | 10                       | -38 | 24 | 3.40             |
| Limbic lobe, parahippocampal gyrus (BA 19)                                                            | Right | 102                         | 26                       | -50 | -4 | 3.61             |
| Hyperactivity of BAT-positive group after heat exposure compared with BAT-negative group <sup>c</sup> |       |                             |                          |     |    |                  |
| Parietal lobe, inferior parietal lobule (BA 40)                                                       | Left  | 284                         | -42                      | -42 | 42 | 4.24             |
| Parietal lobe, precuneus (BA 7)                                                                       | Left  | 318                         | -4                       | -80 | 40 | 4.06             |
| Parietal lobe, precuneus (BA 7)                                                                       | Left  |                             | -18                      | -82 | 54 | 3.88             |
| Parietal lobe, precuneus (BA 7)                                                                       | Left  |                             | -26                      | -80 | 56 | 3.58             |
| Parietal lobe, postcentral gyrus (BA 3)                                                               | Left  | 149                         | -40                      | -30 | 58 | 3.71             |
| Parietal lobe, postcentral gyrus (BA 3)                                                               | Right | 80                          | 52                       | -20 | 60 | 3.69             |

**Note:**—K<sub>E</sub> indicates extend threshold.

<sup>a</sup> Uncorrected  $P < .001$  K<sub>E</sub> = 80

<sup>b</sup> MNI standard space.

<sup>c</sup> Survived in age- and FDR-corrected  $P < .01$ .

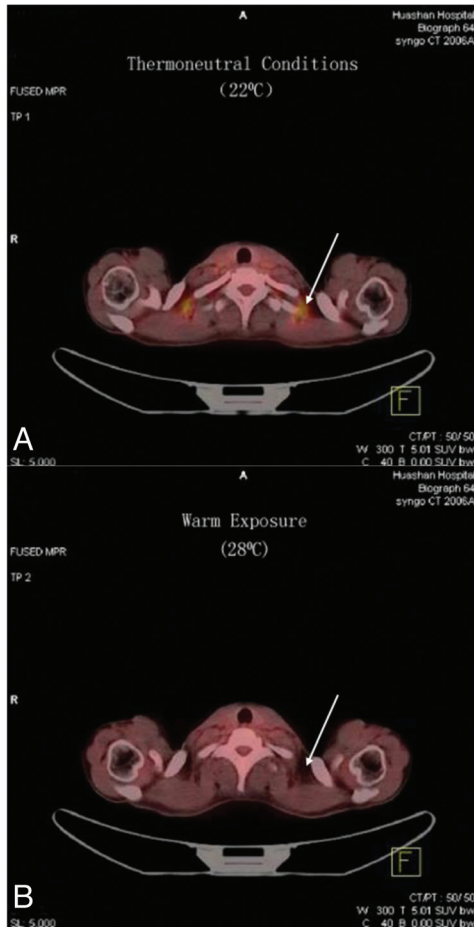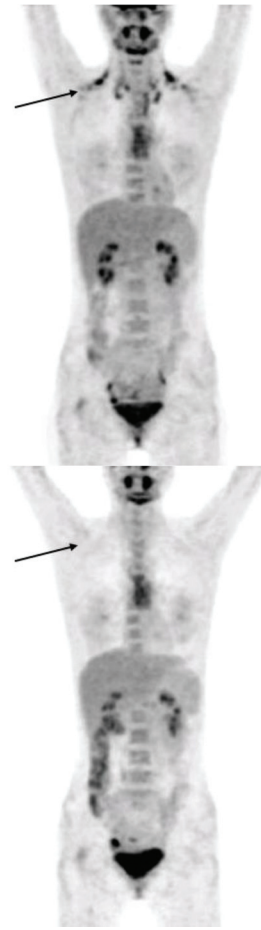

**Online Fig 1.** BAT activity as assessed by PET-CT with  $^{18}\text{F}$ -FDG. The intense yellow regions in the transverse plane of the PET/CT image (A) show the areas of BAT (arrow). Comparative PET-CT scans reveal the patterns of  $^{18}\text{F}$ -FDG uptake in the same subject under thermoneutral conditions (22°C) and after exposure to heat (28°C). There is no detectable BAT activity after heat exposure (arrow, B).
